# Supplementary material
Source: ML conference proceedings conference paper supplement (https://openaccess.thecvf.com/content/WACV_2020/html/Stekovic_Casting_Geometric_Constraints_WACV_2020_paper.html)
Supplement: Supplementary file 1 [file Stekovic_Casting_Geometric_Constraints_WACV_2020_supplemental.pdf]

Archive with 2 entries (2 files):
- Supplementary.mp4
- Supplementary.pdf
