# Supplementary material
Source: ML conference proceedings conference paper supplement (https://openaccess.thecvf.com/content/WACV_2020/html/Stekovic_Casting_Geometric_Constraints_WACV_2020_paper.html)
Supplement: Supplementary file 1 [file Stekovic_Casting_Geometric_Constraints_WACV_2020_supplemental.pdf › Supplementary.pdf]

# Casting Geometric Constraints in Semantic Segmentation as Semi-Supervised Learning - Supplementary Material

Sinisa Stekovic<sup>1</sup>

Friedrich Fraundorfer<sup>1</sup>

Vincent Lepetit<sup>2,1</sup>

<sup>1</sup>Institute for Computer Graphics and Vision, Graz University of Technology, Graz, Austria

<sup>2</sup>Université Paris-Est, École des Ponts ParisTech, Paris, France

{sinisa.stekovic, fraundorfer, lepetit}@icg.tugraz.at

## 1. Temporal Constraints for Semantic Segmentation

As shown in Figure 1, even though comparing predictions of noisy representations of input images has been shown as powerful temporal constraints in semi-supervised learning for image classification problems [9, 11, 1], such constraints are dangerous for semantic segmentation as they induce significant prediction error on pixelwise level. In comparison, our geometric constraints show notably reduced prediction noise which significantly improves probability of convergence for S4-Net.

## 2. Network Initialization And Training

**Initialization.** To initialize the network  $f(\cdot; \Theta)$ , we first train it only based on the  $L_S$  loss term. This avoids the problem of converging to a bad local minimum introduced by the term  $L_G$ . As it is the case with other consistency-based models, minimizing  $L_G$  may fall in a solution where a single class is predicted for all the image locations. Even though tuning hyper-parameter  $\lambda$  more carefully might resolve this problem, we noticed that using this pre-training step makes the convergence to a correct model much easier.

When predicting depth maps, the encoder is shared between the depth network and the segmentation network. The depth decoder has the same architecture as the segmentation decoder, but they do not share any parameters. To initialize the networks  $f(\cdot; \Theta)$  and  $f_d(\cdot; \Theta_d)$ , we train them using only the supervised loss term  $L_S + L_{DS}$ . The full loss term  $L + L_D$  is utilized afterwards.

**Training Details.** At every iteration, we sample a batch of 4 examples from each of the involved datasets. The input images are resized to  $480 \times 360$ . For better convergence, we pre-train the network using only the  $L_S$  term on SUNRGB-D training set until convergence on the SUNRGB-D test set. We use the Adam optimizer [8] with an initial learning rate of  $10^{-4}$  and momentum of 0.9 for this step. In our experiments, we refer to this network as the supervised

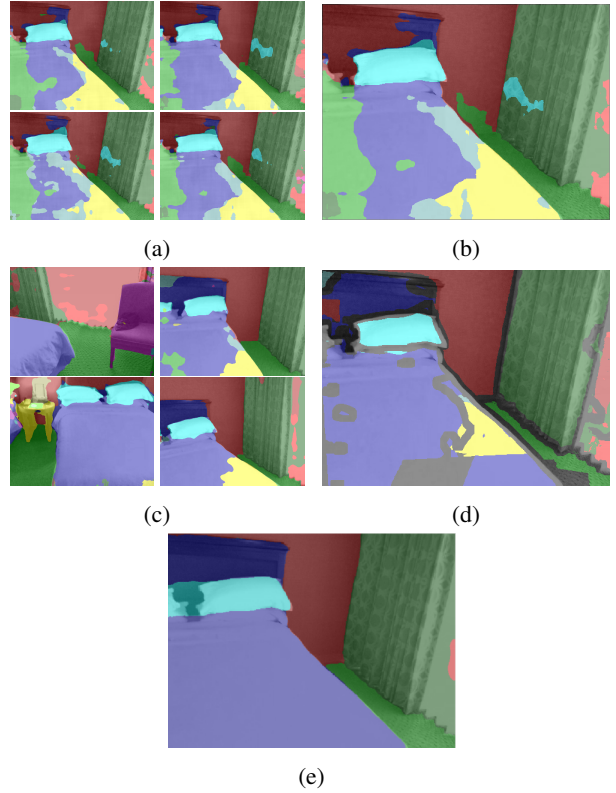

Figure 1: Semi-supervised terms for semantic segmentation. (a) Simply comparing predictions of noisy representations of input training images does not exploit the geometric constraints of the problem. (b) Merging predictions of noise-added inputs induces further errors in pixelwise segmentation and does not perform well as a temporal constraint. (c) and (d) Merging information from different views is more useful as a temporal constraint and enables convergence for S4-Net as shown in (e).

baseline. When learning to segment a target scene with our semi-supervised approach, we fine-tune the network with

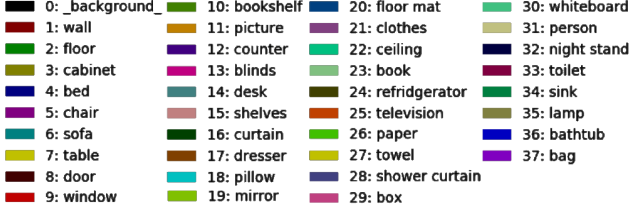

Figure 2: Colormap used for visualizing segmentations. `_background_` is not one of the categories but it is used to visualize regions of images without manual annotations.

initial learning rate of  $10^{-5}$  until no further improvements in performance are notable for the target scene. We found that setting parameter  $\lambda$  to 0.01 balances the loss terms during this stage of training. For the geometric consistency loss term  $L_G$ , for a given sample  $e$ , we randomly sample 4 neighbouring viewpoints with a minimum overlapping region of 25% relative to the viewpoint of  $e$ . Through this, we achieve a trade-off between stability of the training process and the computational costs. In the case of PSPNet, all loss terms are applied to the auxiliary prediction branch as well. According to [14], this step improves gradient back-propagation during training. Furthermore, when applying S4-Net with PSPNet, due to very high computational costs, we set the batch size for the dataset  $\mathcal{U}$  to 3.

### 3. Evaluation Metrics

For quantitative evaluation, we report common evaluation metrics. For a given image, we compare segmentation prediction to the corresponding ground truth annotation using following metrics:

- Pixel accuracy:  $pix\_acc = \sum_i \frac{n_{ii}}{t_i}$  ;
- Mean accuracy:  $mean\_acc = \frac{1}{n_c} \sum_i \frac{n_{ii}}{t_i}$  ;
- Mean IOU:  $mIOU = \frac{1}{n_c} \sum_i \frac{n_{ii}}{t_i + \sum_j n_{ji} - n_{ii}}$  ;
- Frequency weighted IOU:  

$$fwIOU = \frac{1}{\sum_i t_i} \sum_i \frac{t_i n_{ii}}{t_i + \sum_j n_{ji} - n_{ii}}$$
 ,

where  $n_{ij}$  is the number of pixels of class  $i$  predicted as class  $j$ ,  $n_c$  the number of classes, and  $t_i$  the number of pixels that belong to class  $i$ . Results are then averaged across the given dataset to measure the performance.

### 4. Failure Cases

As demonstrated in Figure 3, we observe that S4-Net fails when the estimated camera poses are inaccurate for the registered scene. Hence, the performance of S4-Net is tightly related to the performance of underlying scene registration pipeline.

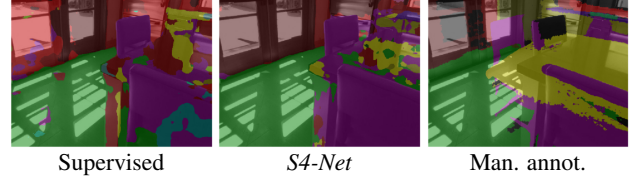

Figure 3: Failure case of S4-Net due to noisy geometric constraints caused by high level of reflectivity in scene0011. Even the manual annotations are inaccurate which indicates high error for camera poses across the scene.

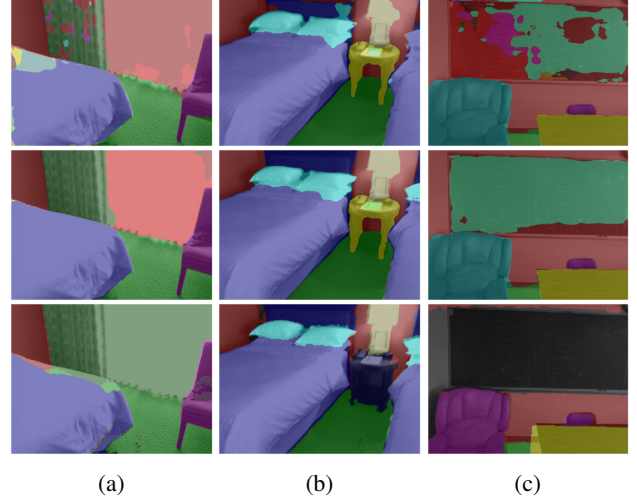

Figure 4: Even though comparisons with ground truth annotations might indicate wrong segmentation predictions, our segmentation predictions are often visually very appealing. In (a), S4-Net wrongly predicts window that is actually occluded by a transparent curtain. In (b), both the supervised baseline and S4-Net confuse the night stand with a table. In (c), S4-Net predicts a sofa where the manual annotation suggests a chair and the actual definition of the category for this object would be a 'single seater sofa'. As this category is not one of the given categories for the task, we find both of these alternatives equally correct.

Furthermore, the categories colormap in Figure 2 clearly reveals many object categories that might be interchangeable with each other. We show in Figure 4 that S4-Net sometimes predicts these 'alternative' categories instead of the ones proposed in manual annotations.

### 5. Quantitative Results for Individual Scenes from ScanNet

Table 1 presents details on all of the ScanNet scans that were used for the experiments. Table 2 presents quantitative experiments on the individual scenes from ScanNet. We observe that S4-Net consistently outperforms its supervised baseline for all of the scenes.

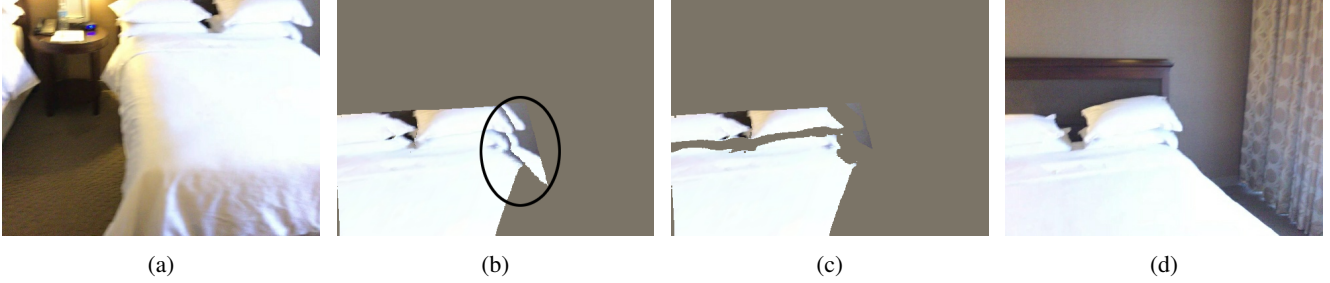

Figure 5: When warping the source view in (a) to the target view (d), we notice that occlusions can lead to association of incorrect correspondences between two views as encircled in (b). When learning to predict depth with  $L_{INT}$  term, this results in errors caused by intensity differences of incorrect correspondences. We resolve this by masking out correspondences with inconsistent segmentation predictions as shown in (c).

| ScanNet<br>Scene | “Scan 1”<br>#Samples | “Scan 2”<br>#Samples |
|------------------|----------------------|----------------------|
| scene0000        | 5578                 | 5920                 |
| scene0006        | 2161                 | 2155                 |
| scene0009        | 980                  | 920                  |
| scene0011        | 2374                 | 2759                 |
| scene0022        | 1896                 | 1339                 |
| scene0030        | 2498                 | 1648                 |

Table 1: Number of samples for the utilized scans from ScanNet.

## 6. Segmentation Mask for Learning Depth Prediction

We observe that the  $L_{INT}$  loss term is very sensitive to occlusions in the scene. Even though existing works utilizing this term for monocular depth estimation achieve good results [15, 5, 13, 10, 12, 6], the baseline between the two camera views is very small. This reduces the negative influence of occlusions between the views and, hence, the network still learns quality depth estimations. As the baseline between the two views increases, occlusions in the scene might have more negative influence on the geometric constraints as we show in Figure 5b. Hence, in order to deal with occlusions in the image, we apply the  $L_{INT}$  term only to the target image pixels where predicted segmentations are consistent with each other and further away from segmentation borders. In Figure 5c we show that such mask successfully masks out the affected regions of the warped image.

## 7. Evaluation of Depth Predictions

In Table 3 and Figure 6 we demonstrate that fine-tuning S4-Net with depth predictions for the target scene also improves depth estimations across the scene. Although applying a smoothness loss term would further improve our depth estimations [4, 15, 5, 13, 10, 12, 6], the quality of the learned predictions is good enough for enforcing geometric constraints on semantic segmentation.

|                                        | “Scan 1” (ScanNet) |              |              |              | “Scan 2” (ScanNet) |              |              |              |
|----------------------------------------|--------------------|--------------|--------------|--------------|--------------------|--------------|--------------|--------------|
|                                        | pix_acc            | mean_acc     | mIOU         | fwIOU        | pix_acc            | mean_acc     | mIOU         | fwIOU        |
| <b>DeepLabV3+ network architecture</b> |                    |              |              |              |                    |              |              |              |
| <b>Supervised baseline</b>             |                    |              |              |              |                    |              |              |              |
| scene0000 (Apartment)                  | 0.67               | 0.505        | 0.398        | 0.591        | 0.709              | 0.536        | 0.435        | 0.643        |
| scene0006 (Hotel room)                 | 0.751              | 0.629        | 0.54         | 0.683        | 0.723              | 0.617        | 0.511        | 0.653        |
| scene0009 (Bathroom)                   | 0.896              | 0.811        | 0.73         | 0.855        | 0.908              | 0.851        | 0.75         | 0.86         |
| scene0011 (Kitchen)                    | 0.675              | 0.532        | 0.407        | 0.575        | 0.716              | 0.555        | 0.442        | 0.622        |
| scene0022 (Lounge)                     | 0.872              | 0.751        | 0.657        | 0.81         | 0.829              | 0.697        | 0.585        | 0.74         |
| scene0030 (Study room)                 | 0.726              | 0.574        | 0.467        | 0.638        | 0.744              | 0.647        | 0.539        | 0.662        |
| <i>Average</i>                         | 0.765              | 0.634        | 0.533        | 0.692        | 0.772              | 0.651        | 0.544        | 0.697        |
| <b>S4-Net</b>                          |                    |              |              |              |                    |              |              |              |
| scene0000 (Apartment)                  | 0.726              | 0.565        | 0.465        | 0.642        | 0.752              | 0.579        | 0.486        | 0.68         |
| scene0006 (Hotel room)                 | 0.816              | 0.725        | 0.647        | 0.767        | 0.782              | 0.679        | 0.599        | 0.73         |
| scene0009 (Bathroom)                   | 0.907              | 0.88         | 0.785        | 0.873        | 0.927              | 0.909        | 0.813        | 0.889        |
| scene0011 (Kitchen)                    | 0.701              | 0.553        | 0.431        | 0.595        | 0.741              | 0.582        | 0.47         | 0.643        |
| scene0022 (Lounge)                     | 0.896              | 0.805        | 0.708        | 0.833        | 0.831              | 0.724        | 0.608        | 0.745        |
| scene0030 (Study room)                 | 0.77               | 0.596        | 0.505        | 0.689        | 0.787              | 0.674        | 0.58         | 0.708        |
| <i>Average</i>                         | <b>0.803</b>       | <b>0.687</b> | <b>0.59</b>  | <b>0.733</b> | <b>0.803</b>       | <b>0.691</b> | <b>0.593</b> | <b>0.732</b> |
| <b>S4-Net with Depth Predictions</b>   |                    |              |              |              |                    |              |              |              |
| scene0000 (Apartment)                  | 0.713              | 0.538        | 0.438        | 0.63         | 0.746              | 0.563        | 0.471        | 0.677        |
| scene0006 (Hotel room)                 | 0.803              | 0.715        | 0.636        | 0.754        | 0.779              | 0.674        | 0.595        | 0.728        |
| scene0009 (Bathroom)                   | 0.932              | 0.89         | 0.804        | 0.902        | 0.956              | 0.924        | 0.848        | 0.925        |
| scene0011 (Kitchen)                    | 0.659              | 0.545        | 0.414        | 0.542        | 0.699              | 0.564        | 0.443        | 0.585        |
| scene0022 (Lounge)                     | 0.9                | 0.791        | 0.701        | 0.842        | 0.825              | 0.704        | 0.59         | 0.738        |
| scene0030 (Study room)                 | 0.759              | 0.593        | 0.493        | 0.674        | 0.775              | 0.674        | 0.569        | 0.695        |
| <i>Average</i>                         | 0.794              | 0.679        | 0.581        | 0.724        | 0.797              | 0.684        | 0.586        | 0.725        |
| <b>PSPNet network architecture</b>     |                    |              |              |              |                    |              |              |              |
| <b>Supervised baseline</b>             |                    |              |              |              |                    |              |              |              |
| scene0000 (Apartment)                  | 0.618              | 0.453        | 0.346        | 0.534        | 0.664              | 0.486        | 0.38         | 0.592        |
| scene0006 (Hotel room)                 | 0.683              | 0.586        | 0.472        | 0.6          | 0.67               | 0.58         | 0.458        | 0.588        |
| scene0009 (Bathroom)                   | 0.888              | 0.81         | 0.705        | 0.832        | 0.904              | 0.814        | 0.725        | 0.847        |
| scene0011 (Kitchen)                    | 0.635              | 0.488        | 0.362        | 0.531        | 0.66               | 0.498        | 0.386        | 0.565        |
| scene0022 (Lounge)                     | 0.849              | 0.724        | 0.618        | 0.777        | 0.821              | 0.685        | 0.569        | 0.726        |
| scene0030 (Study room)                 | 0.686              | 0.522        | 0.414        | 0.591        | 0.703              | 0.599        | 0.478        | 0.609        |
| <i>Average</i>                         | 0.727              | 0.597        | 0.486        | 0.644        | 0.737              | 0.61         | 0.499        | 0.654        |
| <b>S4-Net</b>                          |                    |              |              |              |                    |              |              |              |
| scene0000 (Apartment)                  | 0.716              | 0.523        | 0.42         | 0.63         | 0.731              | 0.541        | 0.445        | 0.66         |
| scene0006 (Hotel room)                 | 0.76               | 0.679        | 0.565        | 0.686        | 0.722              | 0.629        | 0.511        | 0.644        |
| scene0009 (Bathroom)                   | 0.91               | 0.872        | 0.748        | 0.863        | 0.934              | 0.879        | 0.792        | 0.888        |
| scene0011 (Kitchen)                    | 0.68               | 0.523        | 0.4          | 0.567        | 0.722              | 0.552        | 0.44         | 0.617        |
| scene0022 (Lounge)                     | 0.897              | 0.767        | 0.668        | 0.832        | 0.817              | 0.694        | 0.569        | 0.726        |
| scene0030 (Study room)                 | 0.724              | 0.526        | 0.433        | 0.627        | 0.752              | 0.617        | 0.519        | 0.66         |
| <i>Average</i>                         | <b>0.781</b>       | <b>0.648</b> | <b>0.539</b> | <b>0.701</b> | <b>0.78</b>        | <b>0.652</b> | <b>0.546</b> | <b>0.699</b> |

Table 2: Quantitative evaluation on the target scenes from ScanNet. The table shows results calculated per individual scene and average performance over all of the target scenes. The numbers for individual scenes indicate that S4-Net consistently outperforms the supervised baseline for all of the scenes.

| “Scan 2” (ScanNet)                     |                 |              |              |              |                  |                   |                   |
|----------------------------------------|-----------------|--------------|--------------|--------------|------------------|-------------------|-------------------|
|                                        | Lower is better |              |              |              | Higher is better |                   |                   |
|                                        | Abs Rel         | Sq Rel       | RMSE         | RMSE log     | $\delta < 1.25$  | $\delta < 1.25^2$ | $\delta < 1.25^3$ |
| <b>DeepLabV3+ network architecture</b> |                 |              |              |              |                  |                   |                   |
| <b>Supervised baseline</b>             |                 |              |              |              |                  |                   |                   |
| scene0000 (Apartment)                  | 0.296           | 0.192        | 0.524        | 0.271        | 0.449            | 0.918             | 0.99              |
| scene0006 (Hotel room)                 | 0.358           | 0.28         | 0.609        | 0.321        | 0.374            | 0.857             | 0.962             |
| scene0009 (Bathroom)                   | 0.329           | 0.204        | 0.532        | 0.293        | 0.257            | 0.958             | 0.993             |
| scene0011 (Kitchen)                    | 0.319           | 0.322        | 0.711        | 0.303        | 0.444            | 0.9               | 0.967             |
| scene0022 (Lounge)                     | 0.324           | 0.37         | 0.723        | 0.297        | 0.441            | 0.932             | 0.975             |
| scene0030 (Study Room)                 | 0.298           | 0.187        | 0.574        | 0.274        | 0.357            | 0.963             | 0.994             |
| <i>Average</i>                         | 0.321           | 0.259        | 0.612        | 0.293        | 0.387            | 0.921             | 0.98              |
| <b>S4-Net with Depth Predictions</b>   |                 |              |              |              |                  |                   |                   |
| scene0000 (Apartment)                  | 0.115           | 0.048        | 0.269        | 0.131        | 0.885            | 0.988             | 0.998             |
| scene0006 (Hotel room)                 | 0.122           | 0.09         | 0.452        | 0.174        | 0.886            | 0.958             | 0.975             |
| scene0009 (Bathroom)                   | 0.121           | 0.053        | 0.271        | 0.133        | 0.923            | 0.993             | 0.996             |
| scene0011 (Kitchen)                    | 0.168           | 0.159        | 0.553        | 0.219        | 0.804            | 0.938             | 0.975             |
| scene0022 (Lounge)                     | 0.179           | 0.199        | 0.535        | 0.195        | 0.823            | 0.97              | 0.982             |
| scene0030 (Study Room)                 | 0.134           | 0.057        | 0.341        | 0.151        | 0.897            | 0.99              | 0.999             |
| <i>Average</i>                         | <b>0.14</b>     | <b>0.101</b> | <b>0.404</b> | <b>0.167</b> | <b>0.87</b>      | <b>0.973</b>      | <b>0.987</b>      |
| “Scan 2” (“Room”)                      |                 |              |              |              |                  |                   |                   |
|                                        | Abs Rel         | Sq Rel       | RMSE         | RMSE log     | $\delta < 1.25$  | $\delta < 1.25^2$ | $\delta < 1.25^3$ |
| <b>DeepLabV3+ network architecture</b> |                 |              |              |              |                  |                   |                   |
| Supervised baseline                    | 0.419           | 0.263        | 0.584        | 0.358        | 0.153            | 0.839             | 0.99              |
| <i>S4-Net with Depth Predictions</i>   | <b>0.337</b>    | <b>0.183</b> | <b>0.495</b> | <b>0.298</b> | <b>0.307</b>     | <b>0.925</b>      | <b>0.993</b>      |

Table 3: Quantitative evaluation for depth predictions on the target scenes. Results indicate improvements in the depth domain for S4-Net with depth predictions. Hence, we obtain quality geometric constraints for learning semantic segmentation.

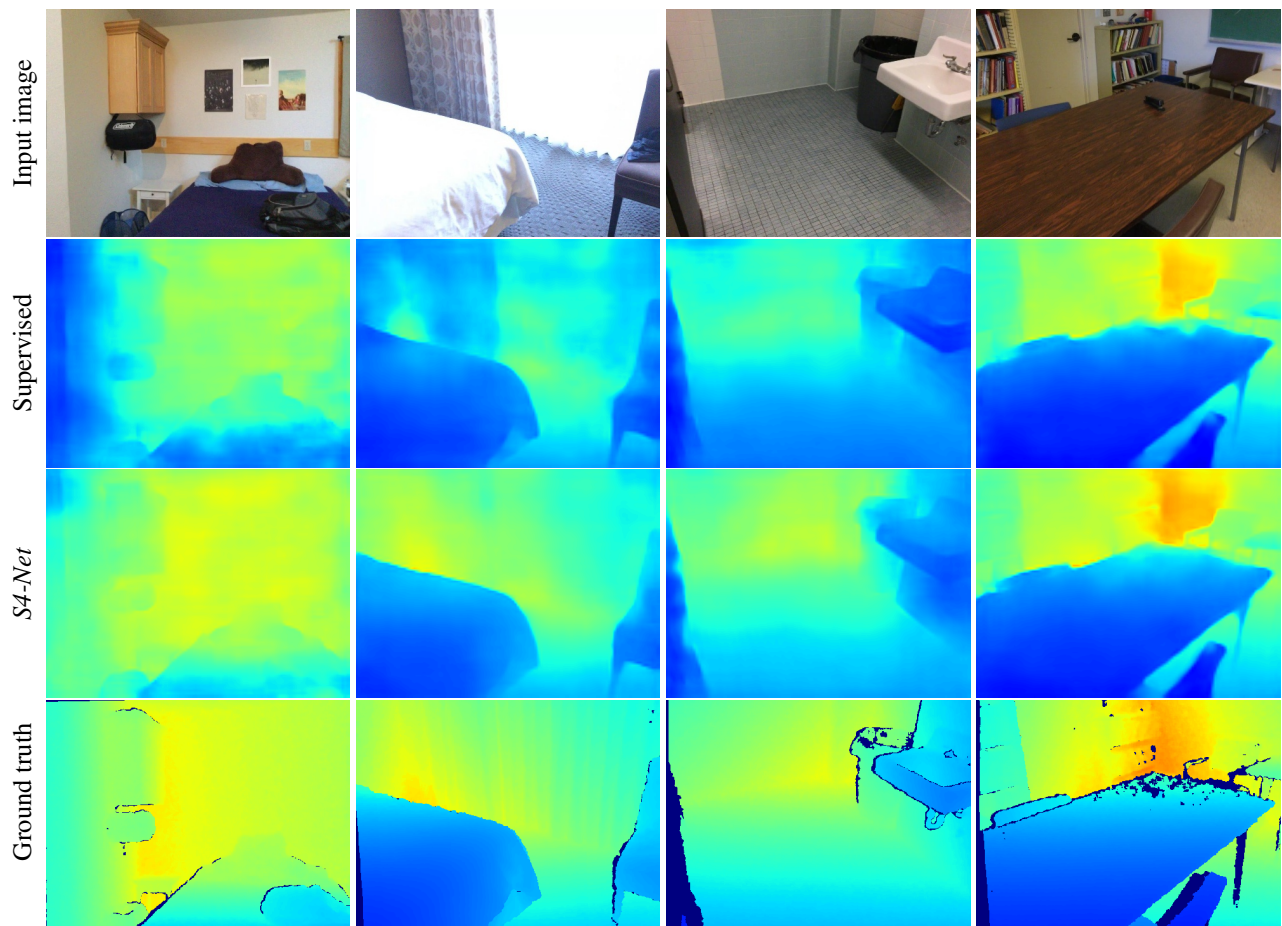

Figure 6: Qualitative evaluation of our depth predictions on unseen images of the target scenes from ScanNet for the DeepLabV3+ network architecture. After applying S4-Net with depth predictions to the target scenes, we observe improvements also in the depth domain.

## References

- [1] B. Athiwaratkun, M. Finzi, P. Izmailov, and A. G. Wilson. There Are Many Consistent Explanations of Unlabeled Data: Why You Should Average. *ICLR*, 2019. 1
- [2] L.-C. Chen, Y. Zhu, G. Papandreou, F. Schroff, and H. Adam. Encoder-Decoder with Atrous Separable Convolution for Semantic Image Segmentation. In *ECCV*, 2018.
- [3] J. Deng, W. Dong, R. Socher, L.-J. Li, K. Li, and L. Fei-Fei. ImageNet: A Large-Scale Hierarchical Image Database. In *CVPR*, 2009.
- [4] R. Garg, V. K. BG, G. Carneiro, and I. Reid. Unsupervised CNN for Single View Depth Estimation: Geometry to the Rescue. In *ECCV*, 2016. 3
- [5] C. Godard, O. Mac Aodha, and G. J. Brostow. Unsupervised Monocular Depth Estimation with Left-Right Consistency. In *CVPR*, 2017. 3
- [6] C. Godard, O. Mac Aodha, and G. J. Brostow. Digging Into Self-Supervised Monocular Depth Estimation. *arXiv preprint arXiv:1806.01260*, 2018. 3
- [7] K. He, X. Zhang, S. Ren, and J. Sun. Deep Residual Learning for Image Recognition. In *CVPR*, 2016.
- [8] D. P. Kingma and J. Ba. Adam: A Method for Stochastic Optimization. In *ICLR*, 2015. 1
- [9] S. Laine and T. Aila. Temporal Ensembling for Semi-Supervised Learning. In *ICLR*, 2017. 1
- [10] R. Mahjourian, M. Wicke, and A. Angelova. Unsupervised Learning of Depth and Ego-Motion from Monocular Video Using 3D Geometric Constraints. In *CVPR*, 2018. 3
- [11] A. Tarvainen and H. Valpola. Mean Teachers are Better Role Models: Weight-Averaged Consistency targets improve Semi-Supervised Deep Learning Results. In *NIPS*, 2017. 1
- [12] C. Wang, J. M. Buenaposada, R. Zhu, and S. Lucey. Learning Depth from Monocular Videos using Direct Methods. In *CVPR*, 2018. 3
- [13] Z. Yin and J. Shi. GeoNet: Unsupervised Learning of Dense Depth, Optical Flow and Camera Pose. In *CVPR*, 2018. 3
- [14] H. Zhao, J. Shi, X. Qi, X. Wang, and J. Jia. Pyramid scene parsing network. In *CVPR*, 2017. 2
- [15] T. Zhou, M. Brown, N. Snavely, and D. G. Lowe. Unsupervised Learning of Depth and Ego-Motion from Video. In *CVPR*, 2017. 3
